# Supplementary material for: Expamers: a new technology to control T cell activation
Source: Springer Nature journal article supplement (doi:10.1038/s41598-020-74595-8), 2020-10-20
Supplement: MOESM2 [file 41598_2020_74595_MOESM2_ESM.pdf]

| GeneID             | Dynabeads   | baseMean    | log2FoldChange | lfcSE       | stat         | pvalue    | padj      | GeneName  | GeneDescription                                                                          | EntrezID | neg_log10padj | Regulation.Direction | Expamers    |
|--------------------|-------------|-------------|----------------|-------------|--------------|-----------|-----------|-----------|------------------------------------------------------------------------------------------|----------|---------------|----------------------|-------------|
| ENSG00000121807.5  | 893,8381542 | 4326,266888 | 2,509195823    | 0,06830113  | 36,73725212  | 1,86E-295 | 3,06E-291 | CCR2      | chemokine (C motif) receptor 2                                                           | 729230   | 290,5148073   | Upregulated          | 5184,374072 |
| ENSG0000011796.3   | 171,8606164 | 2280,431839 | 3,813804551    | 0,106153054 | 35,92741254  | 1,14E-282 | 9,38E-279 | KLRB1     | killer cell lectin-like receptor subfamily B, member 1                                   | 3820     | 278,027831    | Upregulated          | 2807,574645 |
| ENSG00000115956.9  | 281,7229522 | 3514,849467 | 3,664044697    | 0,119183846 | 30,74279619  | 1,53E-207 | 8,37E-204 | PLEK      | pleckstrin                                                                               | 5341     | 203,073654    | Upregulated          | 4323,131096 |
| ENSG0000012682.16  | 636,59815   | 2533,943419 | 2,190856148    | 0,073869465 | 29,65848122  | 2,64E-193 | 1,08E-189 | PLEKHG3   | pleckstrin homology domain containing, family G (with RhoGef domain) member 3            | 26030    | 188,9649002   | Upregulated          | 3008,279737 |
| ENSG00000113088.5  | 408,0200475 | 2262,243984 | 2,631436561    | 0,089963665 | 29,24999289  | 4,49E-188 | 1,48E-184 | GZMK      | granzyme K (granzyme 3; tryptase II)                                                     | 3003     | 183,304948    | Upregulated          | 2725,799968 |
| ENSG00000100450.12 | 192,8465176 | 3224,353267 | 3,905560133    | 0,133689072 | 29,2137574   | 1,30E-187 | 3,56E-184 | GZMH      | granzyme H (cathepsin G-like 2, protein h-CGPX)                                          | 2999     | 183,4491206   | Upregulated          | 3982,229554 |
| ENSG00000150938.9  | 35,9319957  | 735,4794196 | 4,006341654    | 0,15907078  | 25,18590559  | 5,72E-140 | 1,34E-136 | CRIM1     | cysteine rich transmembrane BMP regulator 1 (chordin-like)                               | 51232    | 135,8718591   | Upregulated          | 910,3662768 |
| ENSG00000172215.5  | 493,7070147 | 1913,700179 | 2,129504917    | 0,084771863 | 25,12042314  | 2,98E-139 | 6,12E-136 | CXCR6     | chemokine (C-X-C motif) receptor 6                                                       | 10663    | 135,2133818   | Upregulated          | 2268,69847  |
| ENSG00000112486.14 | 10,21070449 | 647,1186758 | 4,727005345    | 0,190944262 | 24,7559434   | 2,68E-135 | 4,89E-132 | CCR6      | chemokine (C-C motif) receptor 6                                                         | 1235     | 131,3107234   | Upregulated          | 806,3456686 |
| ENSG00000164399.12 | 2215,263336 | 965,1824918 | -1,734807549   | 0,072028944 | -24,0846719  | 3,60E-128 | 5,92E-125 | ACSL6     | acyl-CoA synthetase long-chain family member 6                                           | 23305    | 124,2273878   | Downregulated        | 652,662807  |
| ENSG00000160791.13 | 929,2856863 | 6825,531347 | 2,862764518    | 0,122809465 | 23,31061786  | 3,46E-120 | 5,17E-117 | CCR5      | chemokine (C-C motif) receptor 5 (gene/pseudogene)                                       | 1234     | 116,2862128   | Upregulated          | 8299,592763 |
| ENSG00000000971.15 | 48,37936082 | 453,6341886 | 3,157176902    | 0,143580461 | 21,98890357  | 3,68E-107 | 5,04E-104 | CFH       | complement factor H                                                                      | 3075     | 103,297496    | Upregulated          | 554,9478955 |
| ENSG00000135362.13 | 196,9161175 | 1084,127638 | 2,52480948     | 0,115034667 | 21,94824872  | 9,00E-107 | 1,14E-103 | PRRS1     | proline rich 5 like                                                                      | 79899    | 102,9435766   | Upregulated          | 1305,930518 |
| ENSG00000159640.15 | 1022,004168 | 286,1277581 | -3,055122958   | 0,139889064 | -21,83961259 | 9,76E-106 | 1,15E-102 | ACE       | angiotensin I converting enzyme                                                          | 1636     | 101,9406581   | Downregulated        | 120,1586554 |
| ENSG00000275302.1  | 65,76178155 | 711,0610103 | 3,277045466    | 0,152863967 | 21,43765814  | 5,95E-102 | 6,53E-99  | CCL4      | chemokine (C-C motif) ligand 4                                                           | 6351     | 98,1852048    | Upregulated          | 872,3858175 |
| ENSG00000180739.13 | 19,18159059 | 401,4110913 | 3,816831021    | 0,179454543 | 21,26908761  | 2,20E-100 | 2,26E-97  | S1PR5     | sphingosine-1-phosphate receptor 5                                                       | 53637    | 96,64638102   | Upregulated          | 496,9684665 |
| ENSG00000130589.16 | 234,6179142 | 868,5955375 | 2,041444343    | 0,098235015 | 20,781229    | 6,40E-96  | 6,19E-93  | HEL2Z     | helicase with zinc finger 2, transcriptional coactivator                                 | 85441    | 92,2081615    | Upregulated          | 1027,089943 |
| ENSG00000142634.12 | 2275,074177 | 6046,974125 | 1,569850162    | 0,077126701 | 20,35417222  | 4,26E-92  | 3,90E-89  | EFHD2     | EF-hand domain family, member D2                                                         | 79180    | 88,40935054   | Upregulated          | 6989,944617 |
| ENSG00000155629.14 | 197,5429976 | 813,2722968 | 2,65881571     | 0,107025711 | 20,23697151  | 4,63E-91  | 4,01E-88  | PIK3AP1   | phosphoinositide-3-kinase adaptor protein 1                                              | 118788   | 87,39729876   | Upregulated          | 967,2046217 |
| ENSG00000175274.18 | 29,52369187 | 448,5981756 | 3,505694944    | 0,174097174 | 20,13642644  | 3,54E-90  | 2,91E-87  | TP53I11   | tumor protein p53 inducible protein 11                                                   | 9537     | 86,5359645    | Upregulated          | 553,3667965 |
| ENSG00000232653.8  | 38,54302415 | 487,487071  | 3,317754058    | 0,167079496 | 19,87533817  | 9,52E-88  | 7,46E-85  | GOLGA8N   | golgin A8 family, member N                                                               | 643699   | 84,12735259   | Upregulated          | 599,7230827 |
| ENSG00000104972.15 | 24,75380248 | 609,6701834 | 3,716697963    | 0,192081116 | 19,34962711  | 2,05E-83  | 1,54E-80  | LILRB1    | leukocyte immunoglobulin-like receptor, subfamily B (with TM and ITIM domains), member 1 | 10859    | 79,24387368   | Upregulated          | 755,8992786 |
| ENSG00000169252.5  | 125,0616775 | 815,0110583 | 2,64616814     | 0,13725546  | 19,27914667  | 8,04E-83  | 5,57E-80  | ADRB2     | adrenoceptor beta 2, surface                                                             | 154      | 79,4204323    | Upregulated          | 987,4980434 |
| ENSG00000221869.4  | 23,14915747 | 317,9125408 | 3,394324753    | 0,17691636  | 19,18604226  | 4,84E-82  | 3,32E-79  | CEBPD     | CCAAT/enhancer binding protein (C/EBP), delta                                            | 1052     | 78,47913063   | Upregulated          | 391,603866  |
| ENSG00000158321.15 | 181,852753  | 1181,831314 | 2,640777037    | 0,138161608 | 19,1368198   | 1,94E-81  | 1,28E-78  | AUTS2     | autism susceptibility candidate 2                                                        | 26053    | 77,8934238    | Upregulated          | 1431,8226   |
| ENSG00000162630.5  | 39,6903573  | 409,1162117 | 3,161784564    | 0,165884358 | 19,06017304  | 5,41E-81  | 3,42E-78  | B3GALT2   | UDP-Gal-beta4GlcNAc beta 1,3-galactosyltransferase, polypeptide 2                        | 8707     | 77,46569817   | Upregulated          | 501,4725645 |
| ENSG00000067141.16 | 106,9694261 | 493,569369  | 2,29434503     | 0,121334345 | 18,90927932  | 9,57E-80  | 5,83E-77  | NEO1      | neogenin 1                                                                               | 4756     | 76,2345265    | Upregulated          | 590,2193547 |
| ENSG00000139187.9  | 206,2173258 | 1161,365308 | 2,475413899    | 0,132171112 | 18,72885726  | 2,88E-78  | 1,69E-75  | KLRG1     | killer cell lectin-like receptor subfamily G, member 1                                   | 10219    | 74,77160375   | Upregulated          | 1400,152304 |
| ENSG00000163823.3  | 27,3354722  | 441,9044134 | 3,435432818    | 0,115034667 | 18,48695966  | 2,63E-76  | 1,49E-73  | CCR1      | chemokine (C-C motif) receptor 1                                                         | 1230     | 72,82638008   | Upregulated          | 545,5466487 |
| ENSG00000168229.3  | 13,84280852 | 322,6251914 | 3,587543951    | 0,197542877 | 18,16083678  | 1,05E-73  | 5,78E-71  | PTGDR     | prostaglandin D2 receptor (DP)                                                           | 5729     | 70,23814372   | Upregulated          | 412,3207872 |
| ENSG00000062524.15 | 31,80880831 | 446,4003891 | 3,283997271    | 0,184254538 | 17,82315547  | 4,67E-71  | 2,48E-68  | LYK       | leukocyte receptor tyrosine kinase                                                       | 4058     | 67,60569997   | Upregulated          | 550,0482854 |
| ENSG00000168329.13 | 177,3403365 | 3772,068915 | 3,508300191    | 0,199123538 | 17,61871158  | 1,77E-69  | 9,10E-67  | CXCR3     | chemokine (C-X3-C motif) receptor 3                                                      | 1524     | 66,04108787   | Upregulated          | 4670,75106  |
| ENSG00000114166.7  | 1814,955274 | 3995,842006 | 1,301302814    | 0,074215175 | 17,53418784  | 7,86E-69  | 3,92E-66  | KAT2B     | K(lysine) acetyltransferase 2B                                                           | 8850     | 65,4071769    | Upregulated          | 451,063689  |
| ENSG00000185697.16 | 210,5152148 | 895,5107401 | 2,170288903    | 0,124857458 | 17,38213264  | 1,13E-67  | 5,45E-65  | MYBL1     | v-myb avian myeloblastosis viral oncogene homolog-like 1                                 | 4603     | 64,26350383   | Upregulated          | 1066,759621 |
| ENSG00000044115.20 | 624,7255333 | 1295,041779 | 2,06673072     | 0,070598862 | 17,09196198  | 7,70E-65  | 8,01E-63  | CTNNA1    | catenin (cadherin-associated protein), alpha 1, 102kDa                                   | 1495     | 62,09662581   | Upregulated          | 1462,620835 |
| ENSG00000101665.8  | 99,57382128 | 461,0032231 | 2,251737426    | 0,132540071 | 16,98910861  | 8,89E-65  | 4,52E-62  | SMAD7     | SMAD family member 7                                                                     | 4092     | 61,34505654   | Upregulated          | 551,3605736 |
| ENSG00000203747.9  | 100,0354053 | 794,0178358 | 2,820053573    | 0,166356329 | 16,9518683   | 1,86E-64  | 8,29E-62  | FCGR3A    | Fc fragment of IgG, low affinity IIIa, receptor (CD16a)                                  | 2214     | 61,08169655   | Upregulated          | 967,5134097 |
| ENSG00000148848.14 | 21,50560749 | 298,9810003 | 3,211315367    | 0,189607292 | 16,9366666   | 2,41E-64  | 1,04E-61  | ADAM12    | ADAM metalloproteinase domain 12                                                         | 8038     | 60,9808877    | Upregulated          | 368,3498485 |
| ENSG00000205336.11 | 319,6346957 | 1572,169813 | 2,201868547    | 0,132395029 | 16,63105146  | 4,15E-62  | 1,75E-59  | ADGRG1    | NA                                                                                       | 9289     | 58,566494     | Upregulated          | 1885,303592 |
| ENSG00000115607.9  | 72,48132001 | 348,8864443 | 2,301322985    | 0,140263448 | 16,40714683  | 1,70E-60  | 6,99E-58  | IL18RAP   | interleukin 18 receptor accessory protein                                                | 8807     | 57,15547432   | Upregulated          | 417,9872554 |
| ENSG0000013518.11  | 2242,098924 | 907,9591571 | -1,868882519   | 0,114055055 | -16,38570271 | 2,42E-60  | 9,71E-58  | NT5E      | 5'-nucleotidase, cyto (CD73)                                                             | 4907     | 57,01293338   | Downregulated        | 574,4242153 |
| ENSG0000008969.2   | 292,5810994 | 1001,516664 | 1,840470052    | 0,112883561 | 16,30414592  | 9,22E-60  | 3,61E-57  | LAG3      | lymphocyte-activation gene 3                                                             | 3902     | 56,44231597   | Upregulated          | 1178,750555 |
| ENSG00000124526.14 | 172,162315  | 671,9577466 | 1,997205725    | 0,123136405 | 16,21945776  | 3,67E-59  | 1,41E-56  | ZBP1      | Z-DNA binding protein 1                                                                  | 81030    | 55,85218766   | Upregulated          | 796,906044  |
| ENSG00000156475.13 | 78,55929652 | 517,4540429 | 2,53561766     | 0,158431797 | 16,00447454  | 1,19E-57  | 4,45E-55  | PPP2R2B   | protein phosphatase 2, regulatory subunit B, beta                                        | 5521     | 54,35211055   | Upregulated          | 627,1777295 |
| ENSG0000023902.13  | 631,3129548 | 1660,254044 | 1,520954298    | 0,09895666  | 16,0055296   | 6,20E-53  | 9,50E-51  | PLEKHA1   | pleckstrin homology domain containing, family O member 1                                 | 51177    | 50,02219858   | Upregulated          | 1917,489316 |
| ENSG00000198846.5  | 164,859202  | 720,1042527 | 2,083297063    | 0,135833615 | 15,33712445  | 4,32E-53  | 1,54E-50  | TOX       | thymocyte selection-associated high mobility group box                                   | 9760     | 49,81125362   | Upregulated          | 858,9155154 |
| ENSG00000134545.13 | 208,1376111 | 656,7688766 | 1,780399108    | 0,117265297 | 15,18265977  | 6,61E-52  | 1,61E-49  | KLRC1     | killer cell lectin-like receptor subfamily C, member 1                                   | 3821     | 48,7925528    | Upregulated          | 768,926693  |
| ENSG00000178573.6  | 1453,467011 | 4319,347906 | 1,717954684    | 0,114927617 | 14,94229432  | 1,75E-50  | 5,99E-48  | MAF       | v-maf avian musculoaponeurotic fibrosarcoma oncogene homolog                             | 4094     | 47,22242624   | Upregulated          | 5035,818129 |
| ENSG0000007264.13  | 253,8523515 | 1380,427783 | 2,329134168    | 0,156560774 | 14,8768693   | 6,66E-50  | 1,56E-47  | MATK      | megakaryocyte-associated tyrosine kinase                                                 | 4145     | 46,80589172   | Upregulated          | 1662,071641 |
| ENSG00000150687.11 | 36,83634611 | 324,359649  | 2,69594752     | 0,182672456 | 14,75643789  | 2,80E-49  | 9,20E-47  | PRSS23    | protease, serine, 23                                                                     | 11098    | 46,03621614   | Upregulated          | 396,2404747 |
| ENSG00000204161.13 | 759,2000133 | 1557,055324 | 1,176399523    | 0,079762232 | 14,74882911  | 3,13E-49  | 1,01E-46  | C10orf128 | chromosome 10 open reading frame 128                                                     | 170371   | 45,99584499   | Upregulated          | 1756,519152 |
| ENSG00000178660.8  | 244,3867222 | 804,5771316 | 1,878507953    | 0,12837707  | 14,63273736  | 1,74E-48  | 5,49E-46  | MSC       | musclin                                                                                  | 9242     | 45,26019727   | Upregulated          | 944,6247339 |
| ENSG00000211689.7  | 1026,79018  | 2383,26675  | 1,392111509    | 0,095383473 | 14,59489226  | 3,03E-48  | 9,39E-46  | TRGC1     | T cell receptor gamma constant 1                                                         | 445347   | 45,02716394   | Upregulated          | 2722,385893 |
| ENSG00000144290.16 | 87,63221566 | 389,918524  | 2,138434415    | 0,14804824  | 14,44417317  | 2,73E-47  | 8,31E-45  | SLC4A10   | solute carrier family 4, sodium bicarbonate transporter, member 10                       | 57282    | 44,08041808   | Upregulated          | 465,0176116 |
| ENSG00000197872.11 | 38,69864404 | 260,5483004 | 2,488641152    | 0,172431166 | 14,3266442   | 3,22E-47  | 9,64E-45  | FAM49A    | family with sequence similarity 49, member A                                             | 81553    | 44,01587816   | Upregulated          | 316,9107145 |
| ENSG00000158470.5  | 886,842783  | 1953,379552 | 1,272922426    | 0,088632412 | 14,36152509  | 9,02E-47  |           |           |                                                                                          |          |               |                      |             |

|                    |             |             |              |             |              |          |          |                 |                                                                                       |           |             |               |              |
|--------------------|-------------|-------------|--------------|-------------|--------------|----------|----------|-----------------|---------------------------------------------------------------------------------------|-----------|-------------|---------------|--------------|
| ENSG00000182985.16 | 78,62756525 | 235,4003198 | 1,626978217  | 0,17044715  | 9,545353029  | 1,36E-21 | 1,14E-19 | CADM1           | cell adhesion molecule 1                                                              | 23705     | 18,94151831 | Upregulated   | 274,5935084  |
| ENSG0000000938.12  | 31,45865907 | 499,3161672 | 5,1261430514 | 0,237769063 | 9,511037662  | 1,89E-21 | 1,58E-19 | FGR             | feline Gardner-Rasheed sarcoma viral oncogene homolog                                 | 2268      | 18,80242008 | Upregulated   | 616,2805442  |
| ENSG00000005653.14 | 169,4103434 | 357,4612952 | 1,160055321  | 0,122013036 | 9,507634226  | 1,95E-21 | 1,62E-19 | ABC1            | ATP-binding cassette, sub-family B (MDR/TAP), member 1                                | 5243      | 18,79041118 | Upregulated   | 404,4740332  |
| ENSG00000164949.7  | 6,087517724 | 81,47906266 | 2,245449816  | 0,236335646 | 9,50105127   | 2,08E-21 | 1,72E-19 | GEM             | GTP binding protein overexpressed in skeletal muscle                                  | 2669      | 18,76535686 | Upregulated   | 100,369489   |
| ENSG00000147883.10 | 3,063211348 | 115,6734601 | 2,310712709  | 0,244718418 | 9,442332657  | 3,65E-21 | 2,97E-19 | CDKN2B          | cyclin-dependent kinase inhibitor 2B (p15, inhibits CDK4)                             | 1030      | 18,52745585 | Upregulated   | 143,8260223  |
| ENSG00000243772.7  | 15,17511873 | 90,909007   | 2,064558737  | 0,218695534 | 9,440333336  | 3,72E-21 | 3,01E-19 | KIR2DL3         | killer cell immunoglobulin-like receptor, two domains, long cytoplasmic tail, 3       | 3804      | 18,52131266 | Upregulated   | 109,8424791  |
| ENSG00000170837.2  | 23,7958601  | 101,1415389 | 1,85740788   | 0,19699749  | 9,428586546  | 4,16E-21 | 3,35E-19 | GPR27           | G protein-coupled receptor 27                                                         | 2850      | 18,47478705 | Upregulated   | 120,4779586  |
| ENSG00000073350.13 | 360,1603931 | 863,8098397 | 1,285537339  | 0,136742155 | 9,401177968  | 5,40E-21 | 4,33E-19 | LLGL2           | lethal giant larvae homolog 2 (Drosophila)                                            | 3993      | 18,36360441 | Upregulated   | 989,722013   |
| ENSG00000110987.8  | 570,6946904 | 268,39379   | -1,443908943 | 0,153642091 | -9,39787352  | 4,45E-19 | 4,45E-19 | BCL7A           | B-cell CLL/lymphoma 7A                                                                | 605       | 18,35207907 | Downregulated | 192,8185649  |
| ENSG00000221957.8  | 16,94492484 | 96,61730341 | 2,005395516  | 0,21383881  | 9,378070883  | 6,72E-21 | 5,34E-19 | KIR2DS4         | killer cell immunoglobulin-like receptor, two domains, short cytoplasmic tail, 4      | 3809      | 18,2725476  | Upregulated   | 116,5353981  |
| ENSG00000130834.10 | 515,0915067 | 296,6470691 | -1,039659075 | 0,110945812 | -9,370872639 | 7,19E-21 | 5,66E-19 | MPP1            | membrane protein, palmitoylated 1, 55kDa                                              | 4354      | 18,24709118 | Downregulated | 242,0359597  |
| ENSG00000187210.12 | 187,8865039 | 594,0553582 | 1,55655728   | 0,166119626 | 9,370098626  | 7,25E-21 | 5,68E-19 | GCNT1           | glucosaminyl (N-acetyl) transferase 1, core 2                                         | 2650      | 18,2459792  | Upregulated   | 695,5975718  |
| ENSG00000204472.12 | 571,8530384 | 259,9905366 | -1,506341179 | 0,160787024 | -9,368549405 | 7,35E-21 | 5,73E-19 | AI1F1           | allograft inflammatory factor 1                                                       | 199       | 18,24166825 | Downregulated | 182,0249112  |
| ENSG00000182463.15 | 537,4192592 | 247,0626874 | -1,444414325 | 0,154224561 | -9,365656883 | 7,56E-21 | 5,86E-19 | TSZH2           | teashirt zinc finger homeobox 2                                                       | 128553    | 18,23182343 | Downregulated | 174,4735445  |
| ENSG00000136161.12 | 3337,396976 | 6398,060609 | 1,048102951  | 0,111985213 | 9,35929772   | 8,03E-21 | 6,20E-19 | RCBTB2          | regulator of chromosome condensation (RCC1) and BTB (POZ) domain containing protein 2 | 1102      | 18,20772175 | Upregulated   | 7163,226517  |
| ENSG00000159733.13 | 473,2900662 | 943,2454068 | 1,079702573  | 0,115672369 | 9,334144223  | 1,02E-20 | 7,83E-19 | ZFYVE28         | zinc finger, FYVE domain containing 28                                                | 57732     | 18,1665087  | Upregulated   | 1060,734257  |
| ENSG00000143365.16 | 130,7263813 | 1172,556888 | 2,137568799  | 0,229183564 | 9,326885217  | 1,09E-20 | 8,34E-19 | RORC            | RAR-related orphan receptor C                                                         | 6097      | 18,0788798  | Upregulated   | 143,014515   |
| ENSG00000128604.18 | 136,6435972 | 352,8902447 | 1,393205167  | 0,151584588 | 9,190942067  | 3,89E-20 | 2,92E-18 | IRF5            | interferon regulatory factor 5                                                        | 3663      | 17,5397177  | Upregulated   | 406,5919066  |
| ENSG00000122547.10 | 339,2295591 | 164,0712618 | -1,319543623 | 0,144227946 | -9,14901486  | 5,75E-20 | 4,26E-18 | EEPD1           | endonuclease/exonuclease/phosphatase family domain containing 1                       | 80820     | 17,37091139 | Downregulated | 120,2816875  |
| ENSG00000106701.11 | 94,74080383 | 230,1943709 | 1,341006695  | 0,146970287 | 9,124338812  | 7,22E-20 | 5,25E-18 | FSDL1           | fibronectin type III and SPRY domain containing 1-like                                | 83856     | 17,2960571  | Upregulated   | 264,0577227  |
| ENSG00000138378.17 | 1127,970126 | 2173,601376 | 1,037945303  | 0,113997999 | 9,104943155  | 8,63E-20 | 6,23E-18 | STAT4           | signal transducer and activator of transcription 4                                    | 6775      | 17,20575246 | Upregulated   | 235,009188   |
| ENSG00000409768.14 | 41,86388842 | 271,5938262 | 1,930301515  | 0,213882364 | 9,025061619  | 1,80E-19 | 1,28E-17 | FOXP3           | forkhead box P3                                                                       | 50943     | 16,89320641 | Upregulated   | 349,0231606  |
| ENSG00000189430.12 | 7,599670913 | 66,16120205 | 2,081954618  | 0,23118626  | 9,005529215  | 2,15E-19 | 1,52E-17 | NCR1            | natural cytotoxicity triggering receptor 1                                            | 9437      | 16,81768824 | Upregulated   | 80,80158484  |
| ENSG00000235531.9  | 80,9512661  | 229,4588341 | 1,450668292  | 0,16134457  | 8,991119394  | 2,45E-19 | 1,72E-17 | MSC-A51         | NA                                                                                    | 100132891 | 16,76442437 | Upregulated   | 266,5856471  |
| ENSG00000139193.3  | 5588,113762 | 3109,184426 | -1,138328647 | 0,126961311 | -9,965949054 | 3,08E-19 | 2,14E-17 | CD27            | CD27 molecule                                                                         | 939       | 16,6687841  | Downregulated | 2489,452092  |
| ENSG00000171956.6  | 174,564418  | 52,24655124 | -2,149898773 | 0,240072987 | -9,955188178 | 3,39E-19 | 2,33E-17 | FOXB1           | forkhead box B1                                                                       | 72023     | 16,63188447 | Downregulated | 187,6171539  |
| ENSG00000096675.15 | 1980,78562  | 4263,811199 | 1,182669219  | 0,132950692 | 8,895547674  | 5,81E-19 | 3,95E-17 | RORA            | RAR-related orphan receptor A                                                         | 6095      | 16,40328779 | Upregulated   | 4,834,567594 |
| ENSG00000115363.13 | 79,3616190  | 18,2389403  | -2,219312394 | 0,249536866 | -8,893725513 | 5,91E-19 | 4,00E-17 | EVA1A           | eva-1 homolog A (C. elegans)                                                          | 84141     | 16,39795708 | Downregulated | 29,51627054  |
| ENSG00000197057.8  | 13,21078778 | 80,51938996 | 1,981596973  | 0,223358383 | 8,872722964  | 7,14E-19 | 4,79E-17 | DTHD1           | death domain containing 1                                                             | 401124    | 16,19349408 | Upregulated   | 97,34654051  |
| ENSG00000227028.6  | 232,0942317 | 70,11417841 | -2,14156121  | 0,241467517 | -8,868941212 | 7,38E-19 | 4,94E-17 | SLC8A1-AS1      | SLC8A1 antisense RNA 1                                                                | 100128590 | 16,30650299 | Downregulated | 29,61916508  |
| ENSG00000139289.13 | 411,710139  | 856,0446178 | 1,137436917  | 0,128914425 | 8,823193487  | 1,11E-18 | 7,38E-17 | PHLDA1          | pleckstrin homology-like domain, family A, member 1                                   | 22822     | 16,13207411 | Upregulated   | 967,1283051  |
| ENSG00000116661.9  | 2,53223638  | 53,81821346 | 2,159833891  | 0,244847988 | 8,812121654  | 1,13E-18 | 7,49E-17 | F-box protein 2 | F-box protein 2                                                                       | 26232     | 16,1257842  | Upregulated   | 66,63946091  |
| ENSG00000073282.12 | 531,4925021 | 229,7637812 | -1,520926876 | 0,173244425 | -8,779081228 | 1,65E-18 | 1,08E-16 | TP63            | tumor protein p63                                                                     | 8626      | 15,96828947 | Downregulated | 154,331601   |
| ENSG00000205730.6  | 51,42789029 | 163,5845969 | 1,550161865  | 0,201157263 | 8,757032663  | 2,00E-18 | 1,29E-16 | ITPR1L2         | inositol 1,4,5-trisphosphate receptor interacting protein-like 2                      | 162073    | 15,88972293 | Upregulated   | 191,6237736  |
| ENSG00000031081.10 | 36,42307331 | 184,917747  | 1,885653988  | 0,215332668 | 8,756933623  | 2,01E-18 | 1,29E-16 | ARHGAP31        | Rho GTPase activating protein 31                                                      | 57514     | 15,88972293 | Upregulated   | 222,0414155  |
| ENSG00000244165.1  | 229,2013221 | 478,8900425 | 1,096544959  | 0,126048418 | 8,699394837  | 3,34E-18 | 2,11E-16 | P2RY11          | purinergic receptor P2Y, G-protein coupled, 11                                        | 5032      | 15,7555578  | Upregulated   | 541,3122226  |
| ENSG00000232434.2  | 126,7683556 | 282,5312456 | 1,218045408  | 0,140246465 | 8,683920116  | 3,82E-18 | 2,40E-16 | C9orf172        | chromosome 9 open reading frame 172                                                   | 389813    | 15,56197182 | Upregulated   | 321,4719631  |
| ENSG0000051707.13  | 9,758526723 | 59,6995634  | 1,9461817    | 0,224631563 | 8,67430978   | 4,16E-18 | 2,60E-16 | FCHO2           | FCH domain only 2                                                                     | 115548    | 15,58468012 | Upregulated   | 72,11853174  |
| ENSG0000014739.13  | 638,9610719 | 364,72408   | -1,041755193 | 0,120409008 | -8,651804617 | 5,07E-18 | 3,16E-16 | ACVR2B          | activin A receptor, type IIb                                                          | 93        | 15,50055674 | Downregulated | 296,1648321  |
| ENSG00000239713.7  | 2329,662772 | 4431,846688 | 1,007411458  | 0,116675426 | 8,634306972  | 5,91E-18 | 3,67E-16 | APOBEC3G        | apolipoprotein B mRNA editing enzyme, catalytic polypeptide-like 3G                   | 60489     | 15,43566186 | Upregulated   | 4957,391542  |
| ENSG00000136002.16 | 184,3615735 | 82,5739824  | -1,473991627 | 0,171266518 | -8,60642025  | 7,54E-18 | 4,64E-16 | ARHGEP4         | Rho guanine nucleotide exchange factor (GEF) 4                                        | 50649     | 15,33315616 | Downregulated | 57,08209242  |
| ENSG0000018752.10  | 38,68396216 | 148,8257899 | 1,665312572  | 0,194109989 | 8,579221399  | 9,55E-18 | 5,84E-16 | CDC42BPB        | CDC42 binding protein kinase beta (DMPK-like)                                         | 9578      | 15,2355637  | Upregulated   | 176,3612468  |
| ENSG00000115374.4  | 143,9613921 | 434,7043122 | 1,484894502  | 0,173111579 | 8,577672935  | 9,68E-18 | 5,90E-16 | IFNG            | interferon, gamma                                                                     | 3458      | 15,2292254  | Upregulated   | 507,3900422  |
| ENSG00000138795.9  | 11892,40396 | 6752,571516 | -1,124687188 | 0,131579124 | -8,54761115  | 1,26E-17 | 7,57E-16 | LEF1            | lymphoid enhancer-binding factor 1                                                    | 51176     | 15,1208447  | Downregulated | 5467,6066554 |
| ENSG0000006756.15  | 61,8720246  | 162,0090411 | 1,393861907  | 0,163429314 | 8,528836529  | 1,48E-17 | 8,87E-16 | ARSD            | arylsulfatase D                                                                       | 414       | 15,05188398 | Upregulated   | 187,0432614  |
| ENSG00000174600.13 | 4,53645938  | 69,12545147 | 2,063364009  | 0,242751253 | 8,499797158  | 1,90E-17 | 1,13E-15 | CKM1R1          | chemokine-like receptor 1                                                             | 1240      | 14,94622009 | Upregulated   | 85,3662914   |
| ENSG00000186594.12 | 168,2380536 | 370,1823982 | 1,198933454  | 0,14115356  | 8,493823678  | 2,00E-17 | 1,18E-15 | MIR22HG         | MIR22 host gene (non-protein coding)                                                  | 84981     | 14,92857497 | Upregulated   | 420,6684843  |
| ENSG00000232022.7  | 4,53645938  | 69,12545147 | 2,063364009  | 0,242751253 | 8,499797158  | 1,90E-17 | 1,13E-15 | FAAHP1          | NA                                                                                    | NA        | 14,74173606 | Upregulated   | 57,85066876  |
| ENSG00000099282.9  | 11,64504774 | 90,36276453 | 1,94734941   | 0,230969345 | 8,431202883  | 3,42E-17 | 1,99E-15 | TSPAN15         | tetraspanin 15                                                                        | 23555     | 14,70148218 | Upregulated   | 109,9971937  |
| ENSG0000012689.12  | 267,9043667 | 560,3732121 | 1,11826836   | 0,133274094 | 8,390879321  | 4,83E-17 | 2,78E-15 | RASGRP3         | RAS guanyl releasing protein 3 (calcium and DAG-regulated)                            | 25780     | 14,55521693 | Upregulated   | 633,4902435  |
| ENSG00000073861.2  | 877,0312471 | 1945,347196 | 1,126691084  | 0,134391246 | 8,383664278  | 5,13E-17 | 2,94E-15 | TBX21           | T-box 21                                                                              | 30009     | 14,5316092  | Upregulated   | 2212,4260184 |
| ENSG00000176333.17 | 12,39378339 | 80,69159201 | 1,917226765  | 0,230098808 | 8,33218904   | 7,94E-17 | 4,52E-15 | KIR3DL1         | killer cell immunoglobulin-like receptor, three domains, long cytoplasmic tail, 1     | 3811      | 14,3451771  | Upregulated   | 97,7660417   |
| ENSG00000101400.5  | 227,4557391 | 448,9195361 | 1,060644139  | 0,12733594  | 8,328081899  | 8,22E-17 | 4,66E-15 | SNTA1           | synaptrophin, alpha 1                                                                 | 6640      | 14,33161036 | Upregulated   | 50,2854853   |
| ENSG00000185215.8  | 4,41974465  | 52,80477811 | 2,019059041  | 0,242503546 | 8,325894911  | 8,37E-17 | 4,73E-15 | TNFAIP2         | tumor necrosis factor, alpha-induced protein 2                                        | 7127      | 14,32508542 | Upregulated   | 64,00103647  |
| ENSG00000136193.16 | 105,2333844 | 229,450849  | 1,180742588  | 0,142207529 | 8,299293182  | 1,05E-16 | 5,90E-15 | SCRN1           | secernin 1                                                                            | 9805      | 14,22918779 | Upregulated   | 260,5053851  |
| ENSG00000160856.20 | 22,34683497 | 99,15595184 | 1,756065072  | 0,212831562 | 8,250961741  | 1,57E-16 | 8,79E-15 | FCRL3           | Fc receptor-like 3                                                                    | 115352    | 14,05598935 | Upregulated   | 118,582311   |
| ENSG00000119917.13 | 20,69374378 | 88,77813906 | 1,7570968    | 0,213189653 | 8,241942192  | 1,69E-16 |          |                 |                                                                                       |           |             |               |              |



|                    |             |             |              |             |              |          |          |                |                                                                                          |                       |             |               |             |
|--------------------|-------------|-------------|--------------|-------------|--------------|----------|----------|----------------|------------------------------------------------------------------------------------------|-----------------------|-------------|---------------|-------------|
| ENSG00000125657.4  | 30,56898541 | 98,13481288 | 1,409943075  | 0,214776606 | 6,564695772  | 5,21E-11 | 1,55E-09 | TNFSF9         | tumor necrosis factor (ligand) superfamily, member 9                                     | 8744                  | 8,810745132 | Upregulated   | 115,0262697 |
| ENSG00000205683.11 | 12,62721322 | 52,63781113 | 1,51772727   | 0,231205562 | 6,564603     | 5,22E-11 | 1,55E-09 | DPF3           | D4, zinc and double PHD fingers, family 3                                                | 8110                  | 8,810745132 | Upregulated   | 62,6404601  |
| ENSG00000272763.1  | 1,05997542  | 27,67381195 | 1,64827677   | 0,251776635 | 6,546583514  | 5,89E-11 | 1,74E-09 | RP11-357H14.17 | NA                                                                                       | NA                    | 8,760640082 | Downregulated | 34,3272109  |
| ENSG00000184792.15 | 203,135032  | 111,7820739 | -1,034854485 | 1,58981868  | -6,509261088 | 7,55E-11 | 2,21E-09 | OSBP2          | oxysterol binding protein 2                                                              | 23762                 | 8,65632548  | Downregulated | 88,9438347  |
| ENSG00000137628.16 | 473,411217  | 95,193349   | 1,01523942   | 1,156004436 | 6,507759956  | 7,63E-11 | 2,22E-09 | DDX60          | DEAD (Asp-Glu-Ala-Asp) box polypeptide 60                                                | 55601                 | 8,652751158 | Upregulated   | 1070,638906 |
| ENSG0000048052.21  | 4,692079448 | 45,6785557  | 1,619024594  | 0,24947637  | 6,489691176  | 8,60E-11 | 2,48E-09 | HDAC9          | histone deacetylase 9                                                                    | 9734                  | 8,605200187 | Upregulated   | 55,9251476  |
| ENSG00000196407.11 | 55,29342414 | 128,4706981 | 1,18238223   | 0,182312197 | 6,485480671  | 8,84E-11 | 2,54E-09 | THEM5          | thioesterase superfamily member 5                                                        | 284486                | 8,594588339 | Upregulated   | 146,7650166 |
| ENSG00000158292.6  | 2,611033579 | 29,91214873 | 1,607140009  | 0,250397435 | 6,418356511  | 1,38E-10 | 3,87E-09 | GPR153         | G protein-coupled receptor 153                                                           | 387509                | 8,412682321 | Upregulated   | 36,7342752  |
| ENSG0000010278.11  | 327,3650233 | 168,1143729 | -1,208963839 | 1,189038574 | -6,395328802 | 1,60E-10 | 4,46E-09 | CD9            | CD9 molecule                                                                             | 928                   | 8,350805786 | Downregulated | 128,3017104 |
| ENSG0000034053.14  | 84,4522894  | 182,6457828 | 1,093601029  | 0,171008867 | 6,394996032  | 1,61E-10 | 4,46E-09 | APBA2          | amyloid beta (A4) precursor protein-binding, family A, member 2                          | 321                   | 8,350594173 | Upregulated   | 207,1941561 |
| ENSG00000104312.7  | 50,03245201 | 124,9193182 | 1,200450837  | 0,188129248 | 6,380989941  | 1,76E-10 | 4,86E-09 | RIPK2          | receptor-interacting serine-threonine kinase 2                                           | 8767                  | 8,313022333 | Upregulated   | 143,6410347 |
| ENSG00000171954.12 | 68,87035082 | 66,89970432 | 1,406106246  | 0,220578137 | 6,374640137  | 1,83E-10 | 5,04E-09 | CYP4F22        | cytochrome P450, family 4, subfamily F, polypeptide 22                                   | 126410                | 8,297849072 | Upregulated   | 78,90740269 |
| ENSG00000176356.6  | 123,5054787 | 51,21763525 | -1,421220582 | 0,22349591  | -6,359045141 | 2,03E-10 | 5,56E-09 | PLXNA2         | plexin A2                                                                                | 5362                  | 8,255240206 | Downregulated | 33,14567439 |
| ENSG00000150722.10 | 24,0777361  | 5,320981706 | -1,342883284 | 0,212446391 | -6,321045409 | 2,60E-10 | 7,09E-09 | PPP1R1C        | protein phosphatase 1, regulatory (inhibitor) subunit 1C                                 | 151242                | 8,149565634 | Downregulated | 0,631793107 |
| ENSG0000007237.18  | 21,8946572  | 71,02702327 | 1,382164505  | 0,218863716 | 6,315183384  | 2,70E-10 | 7,34E-09 | GAS7           | growth arrest-specific 7                                                                 | 8527                  | 8,134533854 | Upregulated   | 83,31011479 |
| ENSG00000152192.7  | 109,2839018 | 39,25092945 | -1,539620019 | 0,243991513 | -6,310137591 | 2,79E-10 | 7,55E-09 | POU4F1         | POU class 4 homeobox 1                                                                   | 5457                  | 8,121802288 | Downregulated | 21,74268636 |
| ENSG00000173040.12 | 18,84612773 | 60,35514691 | 1,396785562  | 0,221542095 | 6,304831415  | 2,89E-10 | 7,80E-09 | EVCC           | Ellis van Creveld syndrome 2                                                             | 132884                | 8,107632993 | Upregulated   | 70,7324017  |
| ENSG00000171954.12 | 136,1084688 | 580,3736705 | 1,462433724  | 0,232559325 | 6,288432964  | 3,21E-10 | 8,59E-09 | SIGLEC1P7      | sialic acid binding Ig-like lectin 17, pseudogene                                        | 284367                | 8,065974611 | Upregulated   | 691,4399709 |
| ENSG00000064989.12 | 38,23178439 | 11,29230196 | -1,578562097 | 0,251880283 | -6,267112605 | 3,68E-10 | 9,82E-09 | CALCR          | calcitonin receptor-like                                                                 | 10203                 | 8,007850942 | Downregulated | 45,5743135  |
| ENSG0000018479.9   | 88,41985628 | 188,4977963 | 1,080308522  | 0,172549273 | 6,260869748  | 3,83E-10 | 1,02E-08 | USP18          | ubiquitin specific peptidase 18                                                          | 11274                 | 7,992564558 | Upregulated   | 213,5172814 |
| ENSG00000145990.10 | 42,75400419 | 108,3763018 | 1,241631803  | 0,198492225 | 6,255317059  | 3,97E-10 | 1,05E-08 | GFOD1          | glycose-fructose oxidoreductase domain containing 1                                      | 54238                 | 7,977806401 | Upregulated   | 124,8561261 |
| ENSG00000165409.15 | 217,7214355 | 95,9972072  | -1,379381648 | 0,221099342 | -6,238741523 | 4,41E-10 | 1,16E-08 | TSHR           | thyroid stimulating hormone receptor                                                     | 74533                 | 7,935295268 | Downregulated | 65,5661453  |
| ENSG00000131459.12 | 321,7964718 | 155,0065476 | -1,1837249   | 0,189838661 | -6,235425894 | 4,51E-10 | 1,18E-08 | GFPT2          | glutamine-fructose-6-phosphate transaminase 2                                            | 9945                  | 7,92671766  | Downregulated | 113,3090665 |
| ENSG00000166532.15 | 3,293199057 | 27,49848966 | 1,548003473  | 0,248340401 | 6,233393626  | 4,56E-10 | 1,20E-08 | RIMKB          | ribosomal modification protein rimk-like family member B                                 | 57494                 | 7,927173283 | Upregulated   | 33,4782131  |
| ENSG00000166068.12 | 2,21995084  | 26,93538811 | 1,564564482  | 0,251266802 | 6,22670591   | 4,76E-10 | 1,25E-08 | SPRED1         | spouty-related, EVH1 domain containing 1                                                 | 161742                | 7,9046168   | Upregulated   | 33,1392472  |
| ENSG00000172031.6  | 8,698551303 | 39,30559253 | 1,47927136   | 0,237609355 | 6,225458308  | 4,80E-10 | 1,25E-08 | EPHX4          | epoxide hydrolase 4                                                                      | 253152                | 7,901850221 | Upregulated   | 46,9573284  |
| ENSG00000104951.5  | 4,988637334 | 39,13127831 | 1,546088855  | 0,248404801 | 6,224069928  | 4,84E-10 | 1,26E-08 | IL4I1          | interleukin 4 induced 1                                                                  | 259307                | 7,8969393   | Upregulated   | 47,6693856  |
| ENSG00000125498.19 | 7,599679010 | 40,07356355 | 1,50742687   | 0,242716965 | 6,210636627  | 2,88E-10 | 1,36E-08 | KIR2DL1        | killer cell immunoglobulin-like receptor, two domains, long cytoplasmic tail, 1          | 3802                  | 7,864953862 | Upregulated   | 48,19203671 |
| ENSG00000188305.5  | 14,51374293 | 53,35140794 | 1,416902004  | 0,228189025 | 6,209326686  | 5,32E-10 | 1,37E-08 | C19orf35       | chromosome 19 open reading frame 35                                                      | 374872                | 7,86201594  | Upregulated   | 63,0608237  |
| ENSG00000164136.16 | 31,53646601 | 77,87262188 | 1,209486277  | 0,194883259 | 6,206209215  | 5,43E-10 | 1,40E-08 | IL15           | interleukin 15                                                                           | 3600                  | 7,854084466 | Upregulated   | 89,4566601  |
| ENSG00000100154.12 | 69,17513673 | 22,34175839 | -1,557644974 | 0,251929366 | -6,182863142 | 6,29E-10 | 1,61E-08 | TTC28          | tetratricopeptide repeat domain 28                                                       | 23331                 | 7,793781963 | Downregulated | 10,63341357 |
| ENSG00000203710.10 | 532,424001  | 280,1821048 | -1,172398688 | 0,189852752 | -6,1753052   | 6,60E-10 | 1,68E-08 | CR1            | complement component (3b/4b) receptor 1 (Knops blood group)                              | 1378                  | 7,774340101 | Downregulated | 217,1216307 |
| ENSG00000277089.4  | 3,515389116 | 30,6699522  | 1,537485767  | 0,249227259 | 6,169011251  | 6,87E-10 | 1,74E-08 | AC069363.1     | NA                                                                                       | NA                    | 7,759058945 | Upregulated   | 37,45859297 |
| ENSG00000196460.12 | 68,76186483 | 24,85643964 | -1,508508334 | 0,24495579  | -6,15828812  | 7,35E-10 | 1,86E-08 | RFX8           | RFX family member 8, lacking RFX DNA binding domain                                      | 731220                | 7,731637554 | Downregulated | 13,7580334  |
| ENSG00000164512.17 | 37,0993269  | 172,6081437 | -1,17232235  | 0,190636218 | -6,149525856 | 7,77E-10 | 1,95E-08 | ANKRD55        | ankyrin repeat domain 55                                                                 | 79722                 | 7,70890262  | Downregulated | 131,4853479 |
| ENSG00000176658.16 | 68,34859203 | 152,6772922 | 1,133217487  | 0,184778286 | 6,132849866  | 8,63E-10 | 2,16E-08 | MYO1D          | myosin ID                                                                                | 4642                  | 7,665347876 | Upregulated   | 173,7594672 |
| ENSG00000121297.6  | 17,96599529 | 61,77249708 | 1,383440632  | 0,226250065 | 6,114652984  | 9,68E-10 | 2,40E-08 | TSZH2          | teashirt zinc finger homeobox 3                                                          | 57616                 | 7,619016267 | Upregulated   | 72,7241252  |
| ENSG00000175779.1  | 31,84770878 | 1,207168032 | 1,207168032  | 0,198210539 | 6,090332228  | 1,13E-09 | 2,80E-08 | C15orf53       | chromosome 15 open reading frame 53                                                      | 400359                | 7,553566657 | Upregulated   | 90,31519172 |
| ENSG00000157833.12 | 13,68718864 | 46,59404446 | 1,374259904  | 0,226206308 | 6,075250134  | 1,24E-09 | 3,05E-08 | GAREML         | GRB2 associated, regulator of MAPK1-like                                                 | 150946                | 7,515311033 | Upregulated   | 54,82075842 |
| ENSG00000226423.1  | 139,1621391 | 73,58666095 | -1,01538739  | 0,181345564 | -6,074252451 | 1,25E-09 | 3,07E-08 | AC093642.4     | NA                                                                                       | NA                    | 7,513261645 | Downregulated | 57,19279145 |
| ENSG00000147650.11 | 44,88819479 | 102,8113731 | 1,1422992    | 0,18833786  | 6,068876428  | 1,29E-09 | 3,15E-08 | LRP12          | low density lipoprotein receptor-related protein 12                                      | 29967                 | 7,50107267  | Upregulated   | 117,2920979 |
| ENSG00000129481.10 | 42,33074806 | 103,0529035 | 1,181868977  | 0,195353181 | 6,049909044  | 1,45E-09 | 3,53E-08 | NBPF1          | neuroblastoma breakpoint family, member 1                                                | NA                    | 7,452682393 | Upregulated   | 118,2334424 |
| ENSG00000250303.3  | 33,26737015 | 82,40965467 | 1,200501555  | 0,198623514 | 6,044098863  | 1,50E-09 | 3,65E-08 | RP11-356J5.12  | NA                                                                                       | NA                    | 7,437668703 | Upregulated   | 94,6952258  |
| ENSG00000180797.11 | 144,5545079 | 421,508249  | 1,218527556  | 0,201682206 | 6,041819855  | 1,52E-09 | 3,70E-08 | CNTNAP1        | contactin associated protein 1                                                           | 8506                  | 7,432172801 | Upregulated   | 490,7466843 |
| ENSG00000113758.13 | 483,871491  | 251,302274  | -1,124023893 | 0,186357374 | -6,031550407 | 1,62E-09 | 3,92E-08 | DBN1           | drebrin 1                                                                                | 1627                  | 7,407101156 | Downregulated | 193,159988  |
| ENSG00000186648.14 | 11,27067998 | 42,8488189  | 1,40484969   | 0,233492535 | 6,016678311  | 1,78E-09 | 4,28E-08 | LRRIC16B       | leucine rich repeat containing 16B                                                       | 90668                 | 7,36844402  | Upregulated   | 50,71343238 |
| ENSG00000274767.1  | 7,716385825 | 45,2253186  | 1,465026034  | 0,244005617 | 6,002959764  | 1,94E-09 | 4,64E-08 | AC131056.3     | NA                                                                                       | NA                    | 7,335959999 | Upregulated   | 54,6024437  |
| ENSG00000072840.12 | 32,7784122  | 85,75946973 | 1,253017699  | 0,209046036 | 5,993979701  | 2,05E-09 | 4,89E-08 | EVCC           | Ellis van Creveld syndrome                                                               | 2121                  | 7,31084672  | Upregulated   | 99,0173685  |
| ENSG00000105492.15 | 49,49266378 | 50,32611246 | 1,383652153  | 0,230862171 | 5,993412208  | 2,05E-09 | 4,90E-08 | SIGLEC6        | sialic acid binding Ig-like lectin 6                                                     | 946                   | 7,309959846 | Upregulated   | 59,5344763  |
| ENSG00000187037.8  | 0,491082739 | 33,33770495 | 1,500256951  | 0,252160596 | 5,949608994  | 2,69E-09 | 6,33E-08 | GPR141         | G protein-coupled receptor 141                                                           | 353345                | 7,198339223 | Upregulated   | 41,54936051 |
| ENSG00000185340.15 | 29,96118776 | 92,7679024  | 1,305973434  | 0,219756449 | 5,942821888  | 2,80E-09 | 6,57E-08 | GAS2L1         | growth arrest-specific 2 like 1                                                          | 10634                 | 7,182351008 | Upregulated   | 108,4659811 |
| ENSG00000156381.8  | 62,75215705 | 128,8717156 | 1,046506778  | 0,176511004 | 5,928846039  | 3,05E-09 | 7,13E-08 | ANKRD9         | ankyrin repeat domain 9                                                                  | 122416                | 7,14705701  | Upregulated   | 141,0516052 |
| ENSG00000204577.11 | 50,75696457 | 120,4125609 | 1,138332581  | 0,192474153 | 5,912401006  | 3,33E-09 | 7,74E-08 | LURB3          | leukocyte immunoglobulin-like receptor, subfamily B (with TM and ITIM domains), member 3 | 102725035;10288;11025 | 7,111473774 | Upregulated   | 137,82646   |
| ENSG00000105974.14 | 4,988637334 | 34,1797745  | 1,468929837  | 0,248556834 | 5,90620868   | 3,49E-09 | 7,92E-08 | CAV1           | caveolin 1, caveolae protein, 22kDa                                                      | 857                   | 7,101204471 | Upregulated   | 41,47756248 |
| ENSG0000025571.6   | 25,30801328 | 69,64426872 | 1,240074984  | 0,209986622 | 5,90601434   | 3,51E-09 | 8,07E-08 | MIR-3HG        | NA                                                                                       | NA                    | 7,092883559 | Upregulated   | 80,72833258 |
| ENSG00000134215.15 | 60,81204918 | 153,0820697 | 1,128546611  | 0,191471598 | 5,894067963  | 3,77E-09 | 8,63E-08 | VAV3           | vav 3 guanine nucleotide exchange factor                                                 | 1465719               | 7,063989063 | Upregulated   | 176,1495749 |
| ENSG00000198574.5  | 17,34351576 | 58,89683689 | 1,356035506  | 0,208083873 | 5,875157342  | 4,22E-09 | 9        |                |                                                                                          |                       |             |               |             |

|                     |             |             |              |             |              |          |             |                 |                                                                   |           |             |               |             |
|---------------------|-------------|-------------|--------------|-------------|--------------|----------|-------------|-----------------|-------------------------------------------------------------------|-----------|-------------|---------------|-------------|
| ENSG00000244649.4   | 2,611033579 | 27,2543743  | 1,156011958  | 0,251532766 | 4,595870257  | 4,31E-06 | 5,75E-05    | CTD-2377D24.6   | NA                                                                | NA        | 4,240426317 | Upregulated   | 33,41520948 |
| ENSG00000109906.13  | 44,53805006 | 126,1142862 | 1,009792833  | 0,220390046 | 4,581844113  | 4,61E-06 | 6,11E-05    | ZBTB16          | zinc finger and BTB domain containing 16                          | 7704      | 4,214058177 | Upregulated   | 146,5083452 |
| ENSG00000128596.16  | 19,73580139 | 52,41333442 | 1,06150592   | 0,231799589 | 4,579412435  | 4,66E-06 | 6,17E-05    | CCDC136         | coiled-coil domain containing 136                                 | 64753     | 4,209707569 | Upregulated   | 60,58271768 |
| ENSG00000198478.7   | 43,93025241 | 18,09312092 | -1,14835404  | 0,251068244 | -4,573872109 | 4,79E-06 | 6,32E-05    | SH3BGL2         | SH3 domain binding glutamate-rich protein like 2                  | 83699     | 4,199257913 | Downregulated | 11,63383805 |
| ENSG00000117586.10  | 20,73264875 | 149,7807396 | 1,152170582  | 0,25227857  | 4,56705689   | 4,95E-06 | 6,52E-05    | TNFSF4          | tumor necrosis factor (ligand) superfamily, member 4              | 7292      | 4,18529987  | Upregulated   | 182,0427623 |
| ENSG00000152213.3   | 57,21885012 | 25,97025047 | -1,11501941  | 0,24431541  | -4,563852153 | 5,02E-06 | 6,60E-05    | ARL11           | ADP-ribosylation factor-like 11                                   | 115761    | 4,180584654 | Downregulated | 18,15810056 |
| ENSG00000169432.14  | 40,68719808 | 14,22397092 | -1,123774986 | 0,247654219 | -4,537677527 | 5,69E-06 | 7,41E-05    | SCN9A           | sodium channel, voltage-gated, type IX, alpha subunit             | 6335      | 4,130352465 | Downregulated | 7,608164135 |
| ENSG00000131398.13  | 96,25809769 | 43,27593682 | -1,079832208 | 0,238832657 | -4,521292113 | 6,15E-06 | 7,94E-05    | KCN3            | potassium voltage-gated channel, Shaw-related subfamily, member 3 | 3748      | 4,100099416 | Downregulated | 30,0303966  |
| ENSG00000156463.17  | 109,9937325 | 59,55552682 | -1,029346205 | 0,227980129 | -4,515069837 | 6,33E-06 | 8,16E-05    | SH3RF2          | SH3 domain containing ring finger 2                               | 153769    | 4,088361974 | Downregulated | 46,9459754  |
| ENSG00000140009.18  | 3,141021289 | 23,17025072 | 1,137202714  | 0,252007095 | 4,512582134  | 6,40E-06 | 8,23E-05    | ESR2            | estrogen receptor 2 (ER beta)                                     | 2100      | 4,084624382 | Upregulated   | 28,1775808  |
| ENSG00000205213.13  | 2,64993855  | 18,34448329 | 1,132533764  | 0,252026038 | 4,493717292  | 7,00E-06 | 8,92E-05    | LGR4            | leucine-rich repeat containing G protein-coupled receptor 4       | 53366     | 4,049773842 | Upregulated   | 22,26811948 |
| ENSG00000224596.7   | 67,51690577 | 33,93706738 | -1,014007292 | 0,225848469 | -4,489768275 | 7,13E-06 | 9,08E-05    | ZMIZ1-AS1       | ZMIZ1 antisense RNA 1                                             | NA        | 4,042055645 | Downregulated | 25,54210778 |
| ENSG00000198088.10  | 62,76169826 | 29,99523908 | -1,062309964 | 0,236949842 | -4,483269354 | 7,35E-06 | 9,32E-05    | NUP62CL         | nucleoporin 62kDa C-terminal like                                 | 54830     | 4,030491991 | Downregulated | 21,80362428 |
| ENSG00000262874.1   | 0           | 11,52566376 | 1,102713055  | 0,246666474 | 4,470461825  | 7,81E-06 | 9,85E-05    | C19orf84        | chromosome 19 open reading frame 84                               | 147646    | 4,006453543 | Upregulated   | 14,4070797  |
| ENSG00000198734.10  | 1199,372388 | 682,9648881 | -1,023215255 | 0,229670721 | -4,455140166 | 8,38E-06 | 0,000105346 | F5              | coagulation factor V (proaccelerin, labile factor)                | 2153      | 3,977383556 | Downregulated | 553,863013  |
| ENSG00000105370.7   | 2,081045869 | 17,7301776  | 1,118855178  | 0,251698058 | 4,445227696  | 8,78E-06 | 0,000109902 | LIM2            | lens intrinsic membrane protein 2, 19kDa                          | 3982      | 3,958993558 | Upregulated   | 21,64246053 |
| ENSG00000211829.7   | 284,4595017 | 1876,945329 | 1,113396695  | 0,251769711 | 4,422282144  | 9,77E-06 | 0,000127405 | TRDC            | T cell receptor delta constant                                    | NA        | 3,918004902 | Upregulated   | 2275,066786 |
| ENSG00000090104.11  | 128,2320626 | 375,6424737 | 1,048569793  | 0,237792634 | 4,409597448  | 1,04E-05 | 0,000127405 | RG51            | regulator of G-protein signaling 1                                | 5996      | 3,894813902 | Upregulated   | 437,4950764 |
| ENSG00000173805.15  | 57,24307322 | 24,60456857 | -1,096091127 | 0,248836941 | -4,404856937 | 1,06E-05 | 0,000129882 | TDRD12          | tudor domain containing 12                                        | 91646     | 3,886452551 | Downregulated | 16,4449424  |
| ENSG00000119147.9   | 72,78117822 | 8,498899502 | -1,096526973 | 0,248940318 | -4,404778552 | 1,06E-05 | 0,000129882 | C2orf40         | chromosome 2 open reading frame 40                                | 84417     | 3,886452551 | Downregulated | 4,678329824 |
| ENSG00000185745.9   | 9,072919131 | 29,50776648 | 1,078953501  | 0,245088639 | 4,402299134  | 1,07E-05 | 0,000131082 | IFIT1           | interferon-induced protein with tetratricopeptide repeats 1       | 3434      | 3,882457209 | Upregulated   | 34,61647831 |
| ENSG00000152678.18  | 45,87036227 | 21,01900557 | -1,075859751 | 0,244491992 | -4,400388509 | 1,08E-05 | 0,000131849 | DDX4            | DEAD (Asp-Glu-Ala-Asp) box polypeptide 4                          | 54514     | 3,879929399 | Downregulated | 14,8061669  |
| ENSG00000107311.21  | 23,96102119 | 64,21036843 | 1,028352818  | 0,234300812 | 4,389027962  | 1,14E-05 | 0,000138006 | PTGDS           | prostaglandin D2 synthase 21kDa (brain)                           | 5730      | 3,860101557 | Upregulated   | 74,27270524 |
| ENSG00000224863.2   | 0           | 11,41185219 | 1,076450119  | 0,245870613 | 4,378116223  | 1,20E-05 | 0,000144459 | LINC01398       | NA                                                                | 101929651 | 3,84025541  | Upregulated   | 14,26481523 |
| ENSG00000108702.3   | 12,54940328 | 61,11436502 | 1,095845004  | 0,250516863 | 4,374336294  | 1,22E-05 | 0,000146777 | CCL1            | chemokine (C-C motif) ligand 1                                    | 6346      | 3,833363396 | Upregulated   | 73,25560546 |
| ENSG00000041982.15  | 4,045376826 | 20,12153665 | 1,0945792    | 0,252101081 | 4,361178921  | 1,29E-05 | 0,000155198 | TNC             | tenascin C                                                        | 3371      | 3,809112516 | Upregulated   | 24,1405766  |
| ENSG00000114455.13  | 44,81038485 | 21,27379984 | -1,046058863 | 0,240607528 | -4,347573295 | 1,38E-05 | 0,000163591 | HHLA2           | HERV-H LTR-associating 2                                          | 11148     | 3,786240225 | Downregulated | 15,38965358 |
| ENSG00000274536.4   | 56,83362068 | 28,6265432  | -1,087087619 | 0,250839564 | -4,33379648  | 1,47E-05 | 0,00017355  | RP6-159A1.4     | NA                                                                | NA        | 3,760545343 | Upregulated   | 18,87491274 |
| ENSG00000260027.4   | 8,737456274 | 26,68581292 | 1,057012429  | 0,244640701 | 4,320672824  | 1,56E-05 | 0,000182623 | HOXB7           | homeobox B7                                                       | 3217      | 3,73844338  | Upregulated   | 31,17290208 |
| ENSG00000124279.12  | 15,19934183 | 47,83102062 | 1,057530919  | 0,244778378 | 4,320360837  | 1,56E-05 | 0,000182751 | SCART1          | scavenger receptor protein family member                          | 619207    | 3,738139194 | Upregulated   | 55,98894031 |
| ENSG00000169122.11  | 23,31945924 | 54,8834415  | 1,001555262  | 0,233157102 | 4,295624076  | 1,74E-05 | 0,000201725 | FAM110B         | family with sequence similarity 110, member B                     | 90362     | 3,695239713 | Upregulated   | 62,71806538 |
| ENSG00000084416.0   | 0           | 10,95280836 | 1,035550109  | 0,245277008 | 4,295348016  | 1,74E-05 | 0,000201748 | NFIX            | nuclear factor I/X (CCAAT-binding transcription factor)           | 4784      | 3,695491465 | Upregulated   | 13,6101045  |
| ENSG00000240204.2   | 3,593199057 | 20,03709649 | 1,082042464  | 0,252260499 | 4,289385258  | 1,79E-05 | 0,000206659 | SMKR1           | small lysine-rich protein 1                                       | 100287482 | 3,684745141 | Upregulated   | 24,14807085 |
| ENSG00000248871.1   | 5,07396227  | 22,36327187 | 1,059853233  | 0,247559959 | 4,281198126  | 1,86E-05 | 0,000213812 | TNFSF12-TNFSF13 | TNFSF12-TNFSF13 readthrough                                       | 407977    | 3,669967468 | Upregulated   | 27,68909598 |
| ENSG00000225632.1   | 83,04126924 | 39,72463506 | -1,035048169 | 0,242199893 | -4,273528588 | 1,92E-05 | 0,000220773 | RP5-997D24.3    | NA                                                                | NA        | 3,656053669 | Downregulated | 28,9525151  |
| ENSG00000179934.6   | 836,1964901 | 477,2098493 | -1,015279014 | 0,237686171 | -4,271510664 | 1,94E-05 | 0,000223484 | CCR8            | chemokine (C-C motif) receptor 8                                  | 1237      | 3,652896697 | Downregulated | 387,4631891 |
| ENSG00000167037.18  | 3,102116318 | 19,56312341 | 1,073419619  | 0,251999809 | 4,259604893  | 2,05E-05 | 0,000233428 | SGSM1           | small G protein signaling modulator 1                             | 129049    | 3,631847501 | Upregulated   | 23,67837518 |
| ENSG00000135253.13  | 2,081045869 | 16,9971888  | 1,073419619  | 0,250871157 | 4,230411686  | 2,33E-05 | 0,000263331 | KCP             | kielin/chordin-like protein                                       | 375616    | 3,579498717 | Upregulated   | 20,7262453  |
| ENSG00000228140.1   | 5,02998771  | 10,92349458 | 1,045404476  | 0,247619416 | 4,22181948   | 2,42E-05 | 0,000271709 | RP3-467K16.4    | NA                                                                | NA        | 3,565895206 | Upregulated   | 13,52187129 |
| ENSG00000114529.12  | 53,52361803 | 22,9295886  | -1,062211948 | 0,251618527 | -4,221517242 | 2,43E-05 | 0,000271889 | C3orf52         | chromosome 3 open reading frame 52                                | 79669     | 3,5656087   | Downregulated | 15,28529407 |
| ENSG00000162373.12  | 60,39877638 | 27,14114652 | -1,043726286 | 0,248906995 | -4,193238063 | 2,75E-05 | 0,000303571 | BEND5           | BEN domain containing 5                                           | 79656     | 3,517739565 | Downregulated | 18,82673905 |
| ENSG00000163814.7   | 31,80880381 | 11,3297961  | -1,015832659 | 0,242620927 | -4,18691277  | 2,83E-05 | 0,000311525 | CDPC1           | CUB domain containing protein 1                                   | 64866     | 3,506505656 | Downregulated | 6,210044169 |
| ENSG0000025881.3    | 15,01949885 | 45,89103677 | 1,031978361  | 0,247096412 | 4,176419846  | 2,96E-05 | 0,000324009 | RNASE4          | ribonuclease, RNase A family, 4                                   | 6038      | 3,489434422 | Upregulated   | 53,60892125 |
| ENSG00000126082.8.1 | 12,62721322 | 38,6946199  | 1,018142973  | 0,244105025 | 4,170921818  | 3,03E-05 | 0,000329579 | HMG3P32         | high mobility group box 3 pseudogene 32                           | NA        | 3,482040234 | Upregulated   | 45,21147157 |
| ENSG00000121594.11  | 8,737456274 | 40,57786936 | 1,04447641   | 0,251003463 | 4,161203177  | 3,17E-05 | 0,000341893 | CD80            | CD80 molecule                                                     | 941       | 3,466109817 | Upregulated   | 46,53797263 |
| ENSG00000160068.14  | 4,162091738 | 18,26895337 | 1,04776226   | 0,252126935 | 4,155693473  | 3,24E-05 | 0,000348636 | ZBTB8A          | zinc finger and BTB domain containing 8A                          | 653121    | 3,4576282   | Downregulated | 21,79566877 |
| ENSG00000120708.16  | 0,982165478 | 15,32046099 | 1,033439328  | 0,249473388 | 4,142483229  | 3,44E-05 | 0,00036647  | TGFB1           | transforming growth factor, beta-induced, 68kDa                   | 7045      | 3,435961732 | Upregulated   | 18,90503486 |
| ENSG00000057704.10  | 6,734220346 | 28,40320762 | 1,04150572   | 0,25148812  | 4,141371456  | 3,45E-05 | 0,000367822 | TMCC3           | transmembrane and coiled-coil domain family 3                     | 57458     | 3,434362489 | Upregulated   | 33,82045444 |
| ENSG00000148053.15  | 13,50734566 | 74,49153404 | 1,043024288  | 0,251986576 | 4,139205764  | 3,49E-05 | 0,000370543 | NTRK2           | neurotrophic tyrosine kinase, receptor, type 2                    | 4915      | 3,43116164  | Upregulated   | 89,73758113 |
| ENSG0000019485.12   | 22,11340515 | 70,05660381 | 1,002472278  | 0,243189464 | 4,1221863    | 3,75E-05 | 0,000396456 | PRDM11          | PR domain containing 11                                           | 56981     | 3,401804486 | Upregulated   | 82,04240347 |
| ENSG00000269901.1   | 4,575364536 | 30,40316622 | 1,032556245  | 0,252131605 | 4,095306667  | 4,22E-05 | 0,000440295 | RP11-932O9.9    | NA                                                                | NA        | 3,356256626 | Upregulated   | 36,86011664 |
| ENSG00000267452.1   | 3,632104028 | 27,21499689 | 1,026837039  | 0,251953262 | 4,075506032  | 4,59E-05 | 0,000474372 | RP11-1018N14.5  | NA                                                                | NA        | 3,323881129 | Upregulated   | 33,11072011 |
| ENSG00000166825.13  | 7,599670913 | 30,21710095 | 1,017988717  | 0,249903246 | 4,073531388  | 4,63E-05 | 0,000477813 | ANPEP           | alanyl (membrane) aminopeptidase                                  | 290       | 3,270741634 | Upregulated   | 35,87145845 |
| ENSG00000169245.5   | 6,048612754 | 31,06381083 | 1,019823251  | 0,252116549 | 4,045046851  | 5,23E-05 | 0,000535099 | CXCL10          | chemokine (C-X-C motif) ligand 10                                 | 3627      | 3,271566133 | Upregulated   | 37,31761036 |
| ENSG00000189221.9   | 55,74560191 | 23,63134648 | -1,016482035 | 0,252122792 | -4,031694337 | 5,54E-05 | 0,000562934 | MAOA            | monoamine oxidase A                                               | 4128      | 3,249542436 | Downregulated | 15,60278262 |
| ENSG00000074590.13  | 1,512153188 | 13,37181018 | 1,003512597  | 0,250089744 | 4,012609956  | 6,01E-05 | 0,000605221 | NUAK1           | NUAK family, SNF1-like kinase, 1                                  | 9891      | 3,218086149 | Upregulated   | 16,33672443 |
| ENSG00000128040.10  | 32,572221   |             |              |             |              |          |             |                 |                                                                   |           |             |               |             |
